# Supplementary material for: Efficient high-throughput SARS-CoV-2 testing to detect asymptomatic carriers
Source: HighWire-hosted journal article supplement (doi:10.1126/sciadv.abc5961), 2020-08-21
Supplement: abc5961_SM.pdf [file abc5961_SM.pdf]

## Supplementary Materials for

### **Efficient high-throughput SARS-CoV-2 testing to detect asymptomatic carriers**

Noam Shental<sup>\*</sup>, Shlomia Levy, Vered Wuvshet, Shosh Skorniakov, Bar Shalem, Aner Ottolenghi, Yariv Greenshpan, Rachel Steinberg, Avishay Edri, Roni Gillis, Michal Goldhirsh, Khen Moscovici, Sinai Sachren, Lilach M. Friedman, Lior Neshet, Yonat Shemer-Avni, Angel Porgador<sup>\*</sup>, Tomer Hertz<sup>\*</sup>

<sup>\*</sup>Corresponding author. Email: angel@bgu.ac.il (A. P.); shental@openu.ac.il (N. S.); thertz@bgu.ac.il (T. H.)

Published 21 August 2020, *Sci. Adv.* **6**, eabc5961 (2020)  
DOI: 10.1126/sciadv.abc5961

#### **This PDF file includes:**

Fig. S1

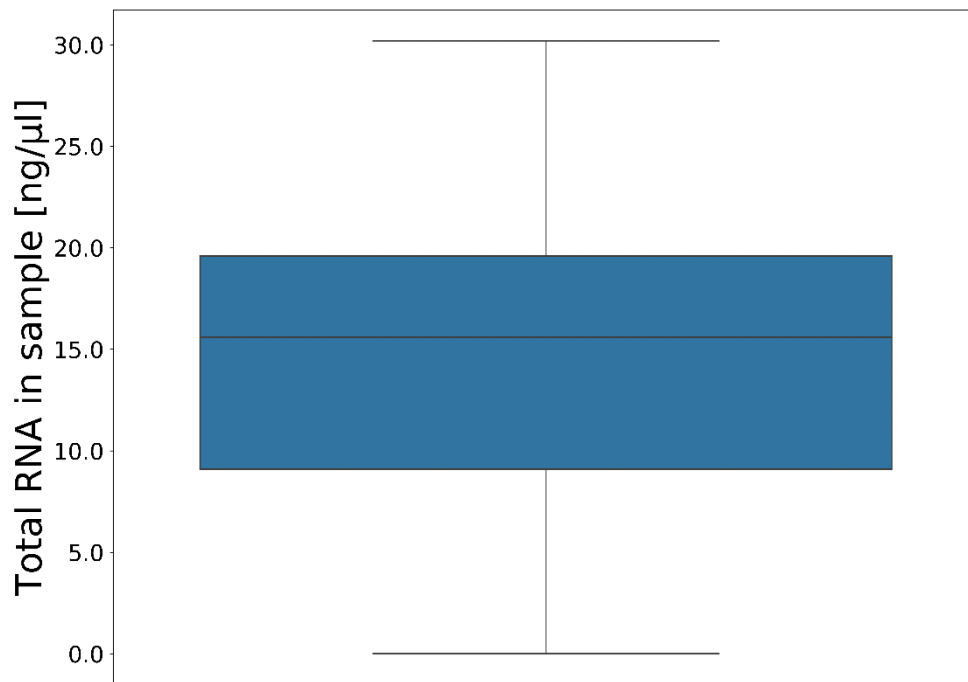

**Supplemental Figure 1: Evaluating variation in total RNA levels.** A boxplot of the total RNA levels of 48 single samples, as measured by the Qubit RNA IQ assay (Invitrogen). The line denotes the median value and box limits are the 25th and 75th percentiles. Lines denote the 95% confidence intervals.
